# Supplementary figures and images for: Comparison of an Artificial Neural Network and a Response Surface Model during the Extraction of Selenium-Containing Protein from Selenium-Enriched Brassica napus L.
Source: MDPI journal article supplement (doi:10.3390/foods11233823), 2022-11-27

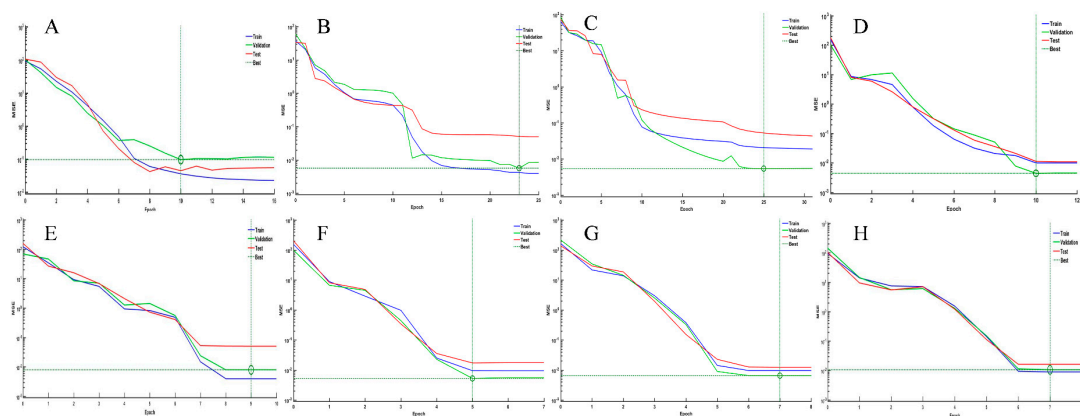

**Figure S1.** MSE of BP neural networks comprising 4-11 nodes (A-H) in the single hidden layer

Supplement: s1 [file s1]
